# Supplementary material for: scds: computational annotation of doublets in single-cell RNA sequencing data
Source: PubMed Central journal article supplement (PMC7703774; doi:10.1093/bioinformatics/btz698), 2019-09-10
Supplement: btz698_supplementary_data.pdf [file btz698_supplementary_data.pdf]

# **scds**: Computational Annotation of Doublets in Single-Cell RNA Sequencing Data — Supplemental Material

Abha Bais<sup>1,3</sup> and Dennis Kostka<sup>1,2,3</sup>

<sup>1</sup> Department of Developmental Biology

<sup>2</sup> Department of Computational and Systems Biology and  
Center for Evolutionary Biology and Medicine

<sup>3</sup> University of Pittsburgh School of Medicine

## Supplemental Tables

| data        | binThresh | AUROC | AUPRC | pAUC950 | pAUC990 | rec05 | prec05 |
|-------------|-----------|-------|-------|---------|---------|-------|--------|
| <b>chcl</b> |           |       |       |         |         |       |        |
| chcl        | 4         | 0.667 | 0.320 | 0.583   | 0.556   | 0.207 | 0.449  |
| chcl        | 5         | 0.666 | 0.317 | 0.582   | 0.552   | 0.206 | 0.446  |
| chcl        | 3         | 0.662 | 0.312 | 0.581   | 0.557   | 0.200 | 0.434  |
| chcl        | 1         | 0.655 | 0.294 | 0.577   | 0.547   | 0.204 | 0.441  |
| chcl        | 0         | 0.652 | 0.265 | 0.568   | 0.528   | 0.198 | 0.429  |
| chcl        | 2         | 0.650 | 0.296 | 0.575   | 0.554   | 0.191 | 0.415  |
| <b>chpb</b> |           |       |       |         |         |       |        |
| chpb        | 0         | 0.778 | 0.539 | 0.653   | 0.559   | 0.244 | 0.796  |
| chpb        | 1         | 0.714 | 0.413 | 0.592   | 0.545   | 0.204 | 0.665  |
| chpb        | 5         | 0.714 | 0.376 | 0.576   | 0.527   | 0.189 | 0.618  |
| chpb        | 2         | 0.712 | 0.406 | 0.590   | 0.542   | 0.205 | 0.669  |
| chpb        | 3         | 0.711 | 0.399 | 0.590   | 0.538   | 0.206 | 0.671  |
| chpb        | 4         | 0.711 | 0.384 | 0.583   | 0.534   | 0.196 | 0.640  |
| <b>demu</b> |           |       |       |         |         |       |        |
| demu        | 0         | 0.886 | 0.493 | 0.634   | 0.528   | 0.278 | 0.595  |
| demu        | 1         | 0.806 | 0.345 | 0.591   | 0.529   | 0.240 | 0.514  |
| demu        | 2         | 0.783 | 0.316 | 0.579   | 0.526   | 0.216 | 0.462  |
| demu        | 3         | 0.780 | 0.310 | 0.577   | 0.528   | 0.212 | 0.454  |
| demu        | 4         | 0.776 | 0.303 | 0.574   | 0.524   | 0.213 | 0.457  |
| demu        | 5         | 0.773 | 0.300 | 0.572   | 0.523   | 0.205 | 0.439  |
| <b>hgmm</b> |           |       |       |         |         |       |        |
| hgmm        | 1         | 0.995 | 0.979 | 0.984   | 0.968   | 0.860 | 0.994  |
| hgmm        | 0         | 0.994 | 0.970 | 0.978   | 0.958   | 0.858 | 0.992  |
| hgmm        | 2         | 0.994 | 0.970 | 0.977   | 0.957   | 0.856 | 0.989  |
| hgmm        | 3         | 0.992 | 0.961 | 0.970   | 0.945   | 0.845 | 0.977  |
| hgmm        | 4         | 0.992 | 0.955 | 0.966   | 0.938   | 0.835 | 0.966  |
| hgmm        | 5         | 0.991 | 0.952 | 0.963   | 0.934   | 0.830 | 0.959  |

Supplemental Table 1: *Effect of the binThresh parameter on cxd's performance.* For each data set we show results for different values of the binThresh parameter for the cxd's method. We find that for chpb and demu, zero is the preferred value; hgmm is relatively robust with respect to changes in this parameter, while for chcl higher values, like four or five, have higher AUPRC than lower values. Again, the effect on AUROC is less pronounced. AUROC: Area under the ROC curve, pAUC\*\*\*: Partial area under the ROC curve at indicated specificity, AUPRC: Area under the precision-recall curve (average precision), prec05: precision considering the 5% highest scores, rec05: recall considering the 5% highest scores.

| data        | ntop | AUROC | AUPRC | pAUC950 | pAUC990 | rec05 | prec05 |
|-------------|------|-------|-------|---------|---------|-------|--------|
| <b>chcl</b> |      |       |       |         |         |       |        |
| chcl        | 900  | 0.667 | 0.346 | 0.602   | 0.572   | 0.240 | 0.520  |
| chcl        | 1000 | 0.667 | 0.346 | 0.601   | 0.572   | 0.240 | 0.520  |
| chcl        | 800  | 0.664 | 0.341 | 0.599   | 0.569   | 0.236 | 0.512  |
| chcl        | 700  | 0.663 | 0.330 | 0.593   | 0.564   | 0.225 | 0.488  |
| chcl        | 600  | 0.661 | 0.321 | 0.589   | 0.563   | 0.214 | 0.463  |
| chcl        | 500  | 0.652 | 0.265 | 0.568   | 0.528   | 0.198 | 0.429  |
| chcl        | 400  | 0.650 | 0.262 | 0.567   | 0.527   | 0.197 | 0.427  |
| chcl        | 300  | 0.649 | 0.258 | 0.567   | 0.525   | 0.197 | 0.427  |
| chcl        | 200  | 0.638 | 0.217 | 0.544   | 0.513   | 0.156 | 0.339  |
| <b>chpb</b> |      |       |       |         |         |       |        |
| chpb        | 900  | 0.782 | 0.544 | 0.656   | 0.558   | 0.245 | 0.799  |
| chpb        | 1000 | 0.782 | 0.544 | 0.656   | 0.558   | 0.244 | 0.795  |
| chpb        | 800  | 0.781 | 0.544 | 0.656   | 0.559   | 0.244 | 0.795  |
| chpb        | 700  | 0.781 | 0.543 | 0.655   | 0.559   | 0.243 | 0.794  |
| chpb        | 600  | 0.779 | 0.541 | 0.654   | 0.558   | 0.244 | 0.797  |
| chpb        | 500  | 0.778 | 0.539 | 0.653   | 0.559   | 0.244 | 0.796  |
| chpb        | 200  | 0.776 | 0.536 | 0.646   | 0.559   | 0.240 | 0.783  |
| chpb        | 300  | 0.775 | 0.538 | 0.652   | 0.560   | 0.244 | 0.795  |
| chpb        | 400  | 0.774 | 0.533 | 0.650   | 0.558   | 0.241 | 0.787  |
| <b>demu</b> |      |       |       |         |         |       |        |
| demu        | 700  | 0.888 | 0.496 | 0.635   | 0.528   | 0.277 | 0.592  |
| demu        | 1000 | 0.888 | 0.495 | 0.632   | 0.529   | 0.274 | 0.587  |
| demu        | 900  | 0.887 | 0.492 | 0.631   | 0.529   | 0.276 | 0.591  |
| demu        | 500  | 0.886 | 0.493 | 0.634   | 0.528   | 0.278 | 0.595  |
| demu        | 600  | 0.886 | 0.492 | 0.633   | 0.528   | 0.278 | 0.595  |
| demu        | 800  | 0.886 | 0.490 | 0.632   | 0.529   | 0.277 | 0.592  |
| demu        | 400  | 0.882 | 0.488 | 0.632   | 0.528   | 0.278 | 0.595  |
| demu        | 300  | 0.881 | 0.497 | 0.640   | 0.529   | 0.281 | 0.602  |
| demu        | 200  | 0.868 | 0.474 | 0.635   | 0.527   | 0.279 | 0.598  |
| <b>hgmm</b> |      |       |       |         |         |       |        |
| hgmm        | 1000 | 0.995 | 0.974 | 0.980   | 0.962   | 0.858 | 0.992  |
| hgmm        | 700  | 0.994 | 0.973 | 0.979   | 0.963   | 0.860 | 0.994  |
| hgmm        | 800  | 0.994 | 0.973 | 0.980   | 0.963   | 0.861 | 0.995  |
| hgmm        | 900  | 0.994 | 0.973 | 0.980   | 0.962   | 0.861 | 0.995  |
| hgmm        | 500  | 0.994 | 0.970 | 0.978   | 0.958   | 0.858 | 0.992  |
| hgmm        | 600  | 0.993 | 0.970 | 0.977   | 0.960   | 0.860 | 0.994  |
| hgmm        | 400  | 0.992 | 0.966 | 0.975   | 0.952   | 0.852 | 0.984  |
| hgmm        | 300  | 0.992 | 0.955 | 0.966   | 0.937   | 0.839 | 0.970  |
| hgmm        | 200  | 0.991 | 0.944 | 0.959   | 0.920   | 0.821 | 0.949  |

Supplemental Table 2: *Effect of the ntop parameter on cxds performance.* For each data set we show results for different values of the `ntop` parameter for the `cxds` method. We find that varying `ntop` within a reasonable range has little effect on performance. While a value of 500 (our default) is not optimal, changes typically have small results on performance. An exception is the `chcl` data set, where large values for `ntop` (900, 1000) increase the area under the precision-recall curve (AUPRC) from 27% to 35% (AUROC increases from 65% to 67%). All other parameters for `cxds` were at default values. AUROC: Area under the ROC curve, pAUC\*\*\*: Partial area under the ROC curve at indicated specificity, AUPRC: Area under the precision-recall pdfcurve (average precision), prec05: precision considering the 5% highest scores, rec05: recall considering the 5% highest scores.

|                      | AUC  | pAUC900 | pAUC950 | pAUC975 | AUPRC |
|----------------------|------|---------|---------|---------|-------|
| <b>ch_cell-lines</b> |      |         |         |         |       |
| bcds                 | 0.69 | 0.66    | 0.65    | 0.63    | 0.43  |
| cxds                 | 0.65 | 0.59    | 0.57    | 0.55    | 0.26  |
| bcds7                | 0.69 | 0.65    | 0.63    | 0.61    | 0.40  |
| <b>ch_pbmc</b>       |      |         |         |         |       |
| bcds                 | 0.81 | 0.71    | 0.66    | 0.60    | 0.58  |
| cxds                 | 0.78 | 0.69    | 0.65    | 0.61    | 0.54  |
| bcds7                | 0.81 | 0.71    | 0.66    | 0.61    | 0.58  |
| <b>demuxlet</b>      |      |         |         |         |       |
| bcds                 | 0.91 | 0.79    | 0.70    | 0.61    | 0.59  |
| cxds                 | 0.89 | 0.71    | 0.63    | 0.57    | 0.49  |
| bcds7                | 0.90 | 0.78    | 0.70    | 0.62    | 0.60  |
| <b>hg-mm</b>         |      |         |         |         |       |
| bcds                 | 0.96 | 0.85    | 0.77    | 0.69    | 0.62  |
| cxds                 | 0.99 | 0.98    | 0.98    | 0.97    | 0.97  |
| bcds7                | 0.97 | 0.91    | 0.86    | 0.78    | 0.74  |

Supplemental Table 3: *Heuristics for bcds*. This table shows the performance of two different heuristics to determine the number of training rounds for **bcds** (see **Methods** Section in the main text). The rows labeled **bcds** use cross validation, while the rows labeled **bcds7** fix the number of training rounds to seven. AUROC: Area under the ROC curve, pAUC\*\*\*: Partial area under the ROC curve at indicated specificity, AUPRC: Area under the precision-recall-curve (average precision).



|                                        | AUROC | pAUC900 | pAUC950 | pAUC975 | pAUC990 | AUPRC | TP   |
|----------------------------------------|-------|---------|---------|---------|---------|-------|------|
| <b>chcl: (889 annotated doublets)</b>  |       |         |         |         |         |       |      |
| libsize                                | 0.60  | 0.54    | 0.53    | 0.52    | 0.51    | 0.17  | 181  |
| features                               | 0.60  | 0.55    | 0.54    | 0.53    | 0.51    | 0.19  | 195  |
| dblCells                               | 0.64  | 0.62    | 0.61    | 0.60    | 0.59    | 0.37  | 296  |
| cxds                                   | 0.65  | 0.59    | 0.57    | 0.55    | 0.53    | 0.26  | 261  |
| scrublet                               | 0.68  | 0.64    | 0.64    | 0.63    | 0.61    | 0.41  | 320  |
| dblDetection                           | 0.68  | 0.66    | 0.66    | 0.65    | 0.65    | 0.45  | 339  |
| bcds                                   | 0.69  | 0.66    | 0.65    | 0.63    | 0.60    | 0.43  | 354  |
| dblFinder                              | 0.69  | 0.66    | 0.65    | 0.65    | 0.64    | 0.45  | 351  |
| hybrid                                 | 0.70  | 0.64    | 0.62    | 0.60    | 0.59    | 0.40  | 333  |
| <b>chpb: (2545 annotated doublets)</b> |       |         |         |         |         |       |      |
| dblCells                               | 0.63  | 0.57    | 0.56    | 0.54    | 0.52    | 0.31  | 807  |
| libsize                                | 0.78  | 0.63    | 0.57    | 0.54    | 0.51    | 0.44  | 1282 |
| scrublet                               | 0.78  | 0.67    | 0.63    | 0.59    | 0.55    | 0.52  | 1287 |
| cxds                                   | 0.78  | 0.69    | 0.65    | 0.61    | 0.56    | 0.54  | 1309 |
| features                               | 0.79  | 0.62    | 0.57    | 0.54    | 0.52    | 0.45  | 1248 |
| bcds                                   | 0.81  | 0.71    | 0.66    | 0.60    | 0.56    | 0.58  | 1503 |
| hybrid                                 | 0.82  | 0.73    | 0.68    | 0.62    | 0.56    | 0.61  | 1544 |
| dblDetection                           | 0.83  | 0.75    | 0.69    | 0.62    | 0.56    | 0.63  | 1655 |
| dblFinder                              | 0.84  | 0.74    | 0.68    | 0.62    | 0.56    | 0.64  | 1623 |
| <b>demu: (1565 annotated doublets)</b> |       |         |         |         |         |       |      |
| dblCells                               | 0.79  | 0.70    | 0.65    | 0.60    | 0.55    | 0.46  | 789  |
| libsize                                | 0.81  | 0.58    | 0.55    | 0.53    | 0.52    | 0.30  | 461  |
| features                               | 0.85  | 0.62    | 0.57    | 0.55    | 0.52    | 0.37  | 580  |
| scrublet                               | 0.87  | 0.74    | 0.68    | 0.62    | 0.55    | 0.54  | 886  |
| cxds                                   | 0.89  | 0.71    | 0.63    | 0.57    | 0.53    | 0.49  | 851  |
| dblDetection                           | 0.90  | 0.79    | 0.69    | 0.59    | 0.53    | 0.58  | 1039 |
| hybrid                                 | 0.91  | 0.78    | 0.68    | 0.59    | 0.53    | 0.58  | 1018 |
| bcds                                   | 0.91  | 0.79    | 0.70    | 0.61    | 0.54    | 0.59  | 1003 |
| dblFinder                              | 0.92  | 0.79    | 0.70    | 0.63    | 0.56    | 0.62  | 996  |
| <b>hgmm: (741 annotated doublets)</b>  |       |         |         |         |         |       |      |
| libsize                                | 0.87  | 0.66    | 0.59    | 0.54    | 0.51    | 0.26  | 242  |
| features                               | 0.89  | 0.68    | 0.60    | 0.55    | 0.52    | 0.30  | 261  |
| dblCells                               | 0.93  | 0.88    | 0.84    | 0.79    | 0.71    | 0.73  | 530  |
| bcds                                   | 0.96  | 0.85    | 0.77    | 0.69    | 0.61    | 0.62  | 453  |
| hybrid                                 | 0.98  | 0.93    | 0.89    | 0.86    | 0.84    | 0.87  | 558  |
| scrublet                               | 0.99  | 0.96    | 0.94    | 0.91    | 0.85    | 0.91  | 613  |
| cxds                                   | 0.99  | 0.98    | 0.98    | 0.97    | 0.96    | 0.97  | 683  |
| dblDetection                           | 0.99  | 0.98    | 0.97    | 0.97    | 0.97    | 0.97  | 705  |
| dblFinder                              | 1.00  | 0.99    | 0.99    | 0.99    | 0.97    | 0.98  | 706  |

Supplemental Table 4: *Performance of doublet prediction methods across data sets.* AUROC: Area under the ROC curve, pAUC\*\*\*: Partial area under the ROC curve at indicated specificity, AUPRC: Area under the precision-recall-curve (average precision).

|            | scrublet | dblDetection | dblCells | dblFinder | hybrid   | bcds     | cxds     | features | libsize  |
|------------|----------|--------------|----------|-----------|----------|----------|----------|----------|----------|
| odds_ratio | 6.90     | 6.01         | 3.97     | 3.32      | 3.11     | 3.00     | 3.04     | 1.20     | 0.98     |
| p_value    | 4.01e-19 | 2.86e-18     | 2.29e-11 | 2.20e-10  | 2.45e-09 | 3.68e-09 | 1.06e-07 | 4.24e-01 | 9.18e-01 |

Supplemental Table 5: *Enrichment of heterotypic doublets in true positive annotations.* Columns code for different annotation methods. OR = odds ratio. P-values are via a Fisher exact test.

|              | ch_cell-lines |      |      |      | ch_pbmc |      |      |      | demu |      |      |      |
|--------------|---------------|------|------|------|---------|------|------|------|------|------|------|------|
|              | TP            | sen  | spe  | pre  | TP      | sen  | spe  | pre  | TP   | sen  | spe  | pre  |
| libsize      | 93            | 0.10 | 0.96 | 0.26 | 460     | 0.18 | 0.97 | 0.56 | 504  | 0.32 | 0.91 | 0.29 |
| features     | 112           | 0.13 | 0.97 | 0.31 | 471     | 0.19 | 0.97 | 0.57 | 645  | 0.41 | 0.92 | 0.37 |
| dblDecon     | 199           | 0.22 | 0.98 | 0.55 | 396     | 0.16 | 0.97 | 0.48 | 539  | 0.34 | 0.91 | 0.31 |
| dblCells     | 211           | 0.24 | 0.98 | 0.58 | 409     | 0.16 | 0.97 | 0.50 | 836  | 0.53 | 0.93 | 0.48 |
| cxds         | 162           | 0.18 | 0.97 | 0.45 | 651     | 0.26 | 0.99 | 0.79 | 915  | 0.58 | 0.94 | 0.53 |
| scrublet     | 253           | 0.28 | 0.98 | 0.70 | 619     | 0.24 | 0.98 | 0.75 | 932  | 0.60 | 0.94 | 0.54 |
| hybrid       | 220           | 0.25 | 0.98 | 0.61 | 657     | 0.26 | 0.99 | 0.80 | 1102 | 0.70 | 0.95 | 0.63 |
| bcds         | 260           | 0.29 | 0.99 | 0.72 | 642     | 0.25 | 0.99 | 0.78 | 1084 | 0.69 | 0.95 | 0.62 |
| dblFinder    | 273           | 0.31 | 0.99 | 0.75 | 667     | 0.26 | 0.99 | 0.81 | 1077 | 0.69 | 0.95 | 0.62 |
| dblDetection | 284           | 0.32 | 0.99 | 0.78 | 662     | 0.26 | 0.99 | 0.81 | 1106 | 0.71 | 0.95 | 0.63 |

Supplemental Table 6: *Comparison of doublet annotation methods with dblDecon.* TP: True Positives, sen: sensitivity, spe: specificity, pre: precision. Rows are ordered by average precision.

## Supplemental Figures

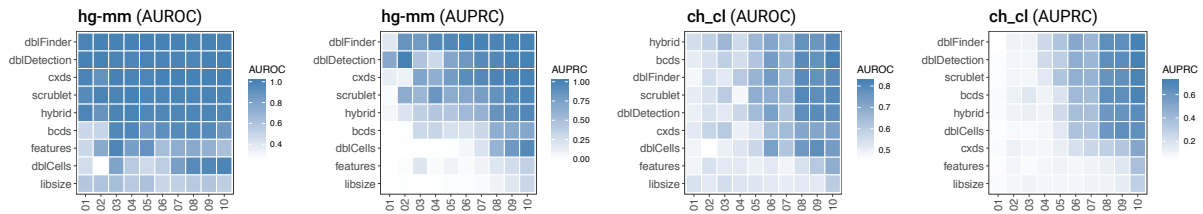

Supplemental Figure 1: **Performance of methods, stratified by library size.** For two data sets, the first panel shows performance in terms of the area under the ROC curve (AUROC), while the second shows performance under the precision-recall curve (AUPRC), respectively. In each panel the rows correspond to methods, and the columns to groups of cells in the same stratum of library sizes. The left-most column focuses on the 10% of cells with the lowest library size, the next column on the cells between the 10% and the 20% quantile, and so on. In each panel methods are ranked by their average performance across quantile bins.

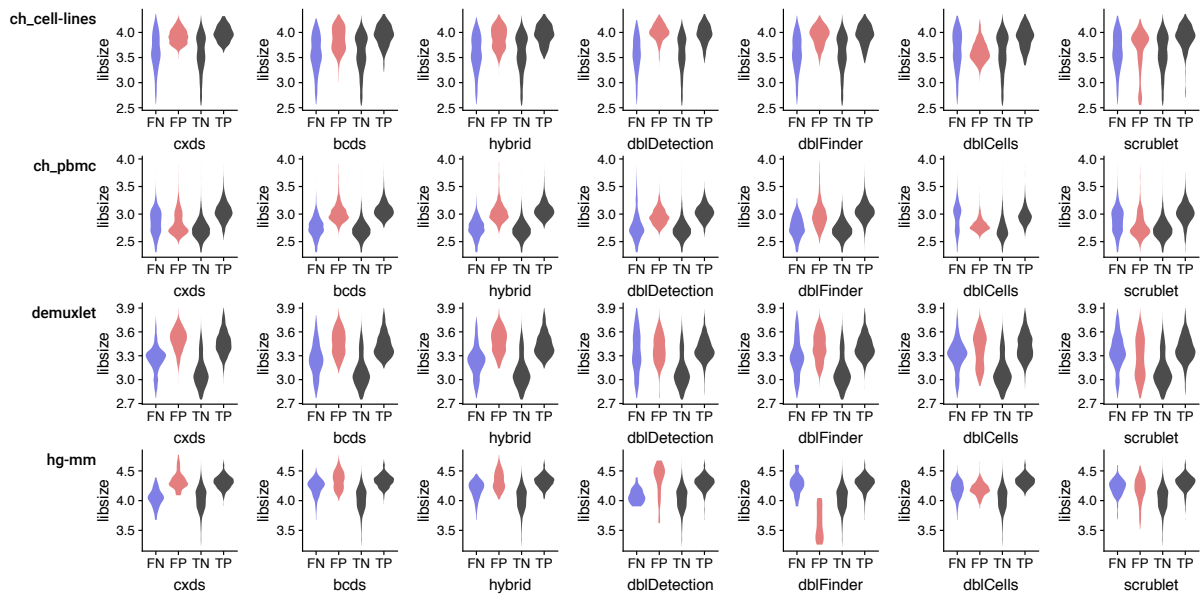

Supplemental Figure 2: *Library size of doublet annotations, stratified by prediction type.* For each data set (rows) and each method (columns) violin plots of library sizes are shown for false negative predictions (FN, blue), false positive predictions (FP, red) and true negative and true positive predictions (TN and TP, both black). For most (but not all) method/dataset combinations library size in FP predictions tends to be higher compared with FN predictions.

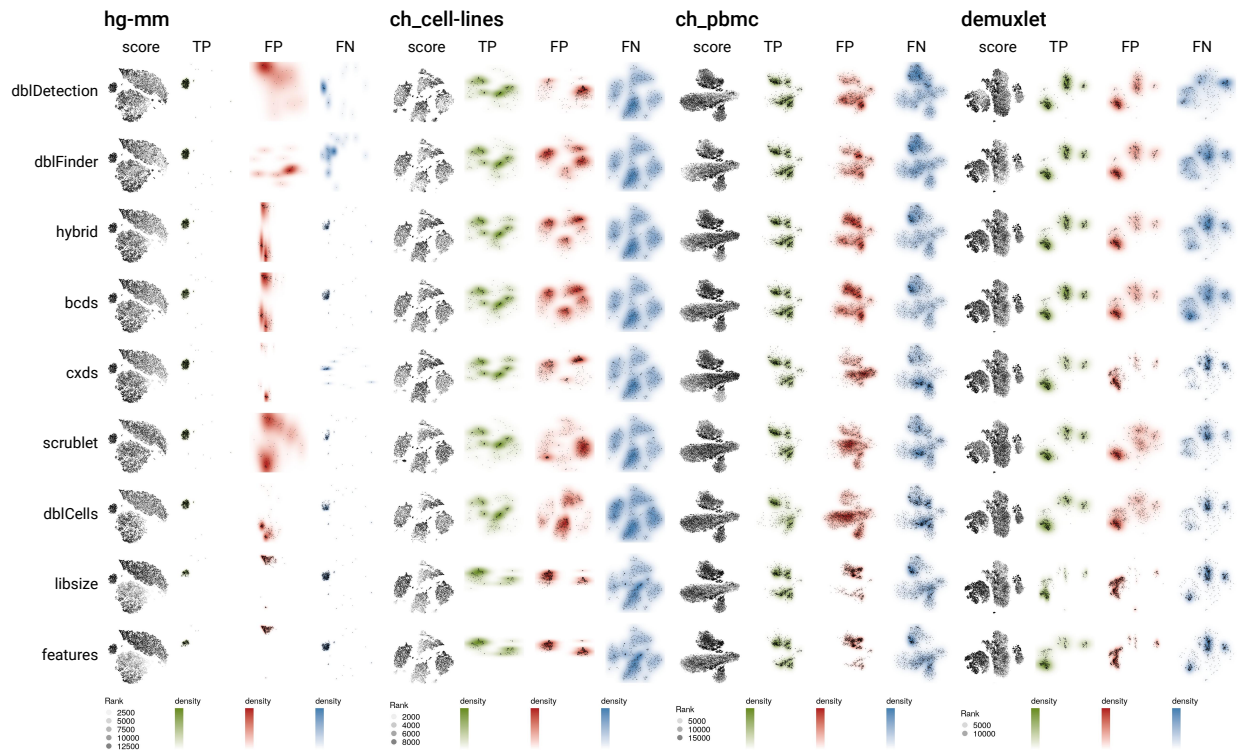

Supplemental Figure 3: *Visual comparison of doublet predictions.* For each data set (major columns), we show four panels (minor columns) for the nine methods we compared (rows). The first (left-most) panel depicts all cells, shaded by the rank of the respective doublet prediction score for a method. The second, third and fourth panels show true positive (TP, green), false positive (FP, red) and false negative (FN, blue) predictions for a method, respectively. Shading reflects the relative density, cells are shown in black.

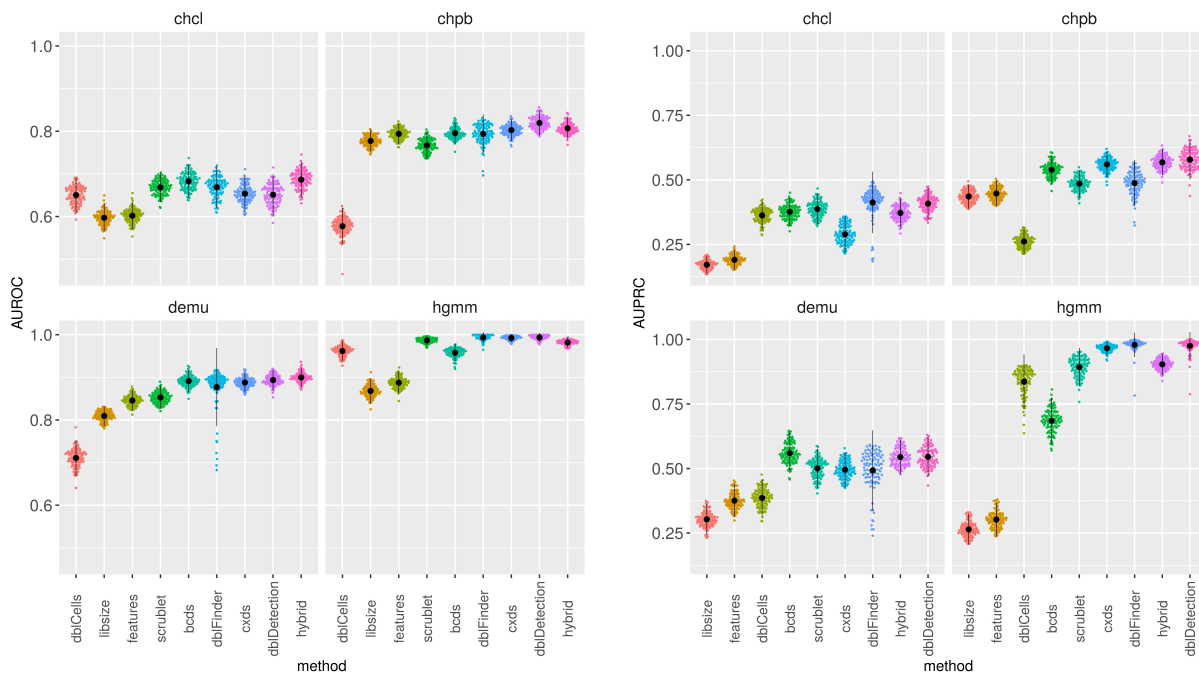

Supplemental Figure 4: ***Robustness of computational doublet predictions.*** We repeatedly (100 times) randomly sampled 2,000 cells from each of the four data sets and ran each doublet prediction method on the resulting subsets. On the left, performance is shown in terms of AUROC (area under the ROC curve), and on the right in terms of AUPRC (area under the precision-recall curve). We see that while performance is generally in line with expectations from analyses of the complete data sets, there is appreciable variability in performance for fixed method/dataset combinations between resampling runs.

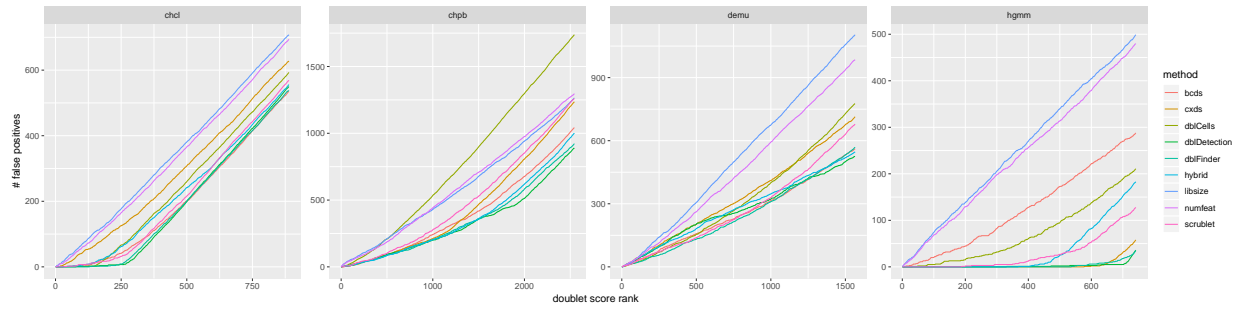

Supplemental Figure 5: ***Number of false positive predictions for computational doublet annotation methods.*** For each data set and each method, barcodes are ranked by their doublet annotation scores ( $x$ -axis, ranks). The  $y$ -axis shows the (cumulative) number of false positive doublet annotations.



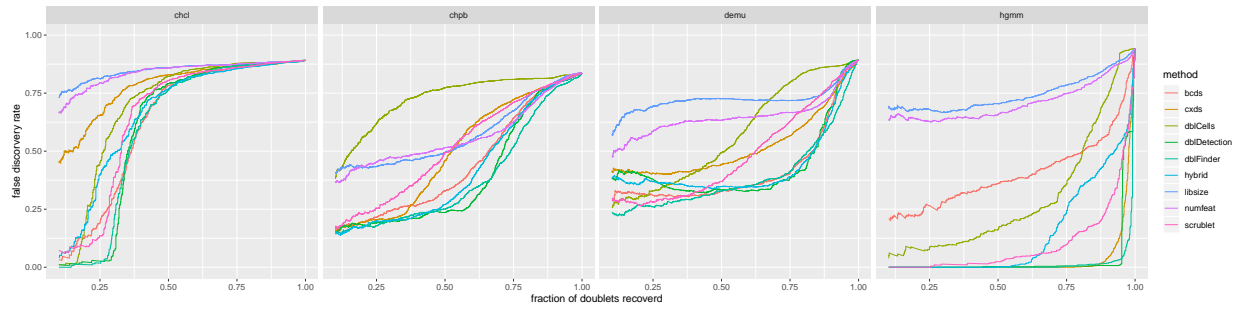

Supplemental Figure 6: ***False discovery rates for computational doublet annotation methods.*** For each data set and each method, barcodes are ranked by their doublet annotation scores ( $x$ -axis, scaled to reflect the corresponding fraction of experimental doublets recovered). The  $y$ -axis shows the false discovery rate.
